# Supplementary material for: TDP-43 and other hnRNPs regulate cryptic exon inclusion of a key ALS/FTD risk gene, UNC13A
Source: PubMed Central journal article supplement (PMC10057836; doi:10.1371/journal.pbio.3002028), 2023-03-17
Supplement: pbio.3002028.s009.pdf [file pbio.3002028.s009.pdf]

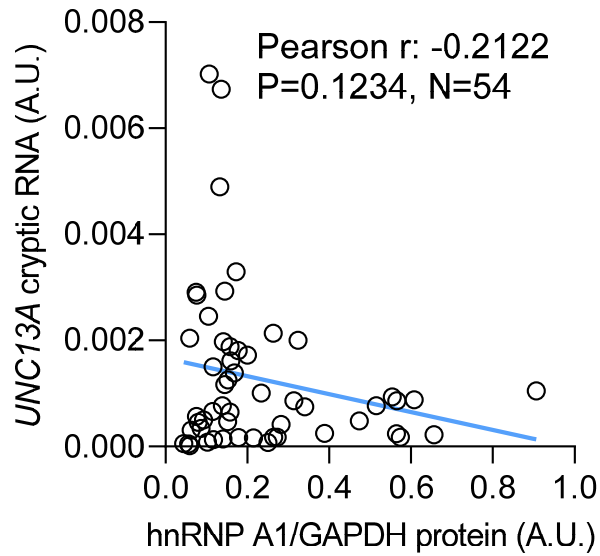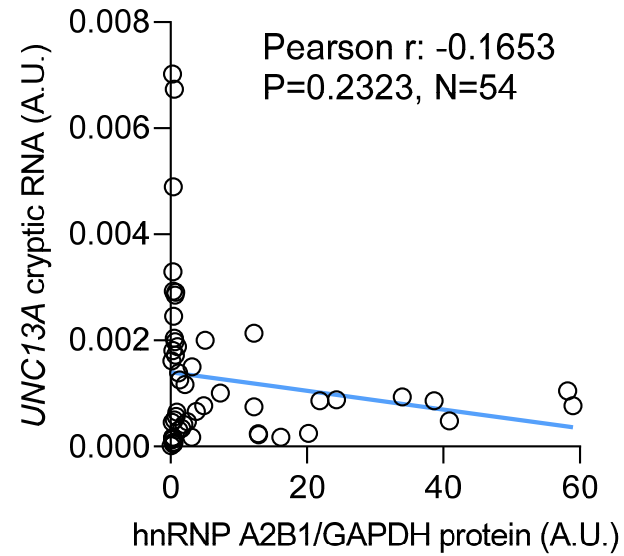

**S9 Fig. hnRNP A1 and hnRNP A2B1 protein levels do not associate with *UNC13A* cryptic RNA levels. Related to Fig 5A.** hnRNP A1 and hnRNP A2B1 protein levels were measured in frontal cortex samples from 54 FTLT-DTP cases by Western blot and quantified by Image J. The associations of hnRNP A1 or hnRNP A2B1 protein levels with *UNC13A* cryptic RNA using Pearson correlation test are shown. Data used to generate the graphs in A-B can be found in **S3 Table**.
